# Supplementary material
Source: publisher site journal article supplement (https://www.dovepress.com/get_supplementary_file.php?f=315061.docx)
Supplement: Supplementary file 1 [file get_supplementary_file.php]

**
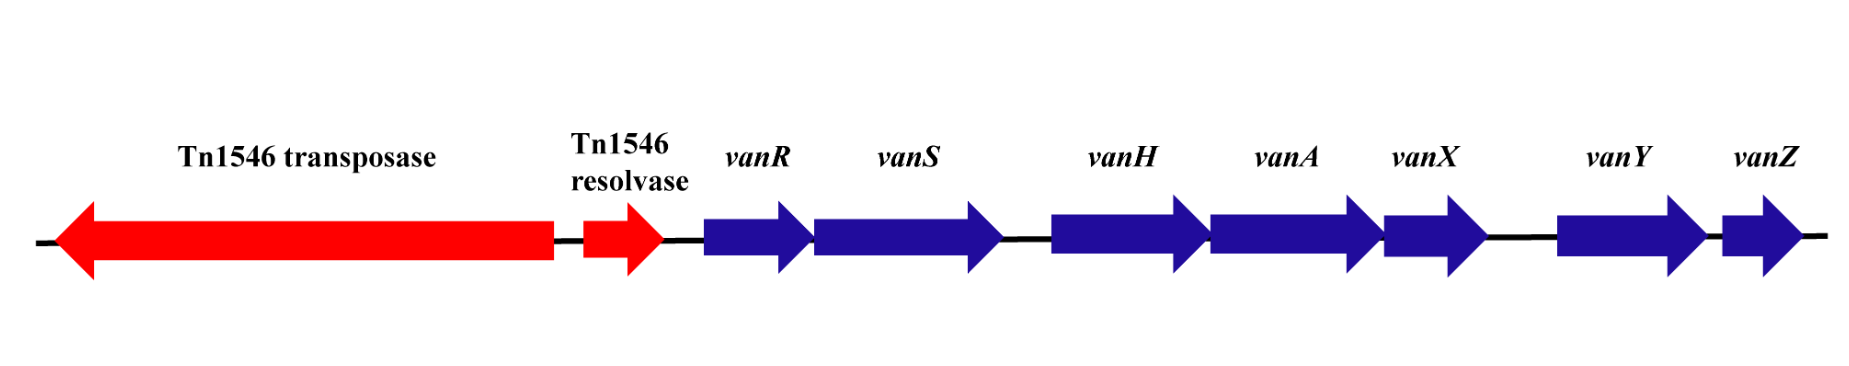
**

**Supplemental Figure 1.** The Schematic diagram of genomic island including *vanZ*, *vanY*, *vanX*, *vanA*, *vanH*, *vanS*, *vanR* for isolates *4942, 5734,* and *9604*.


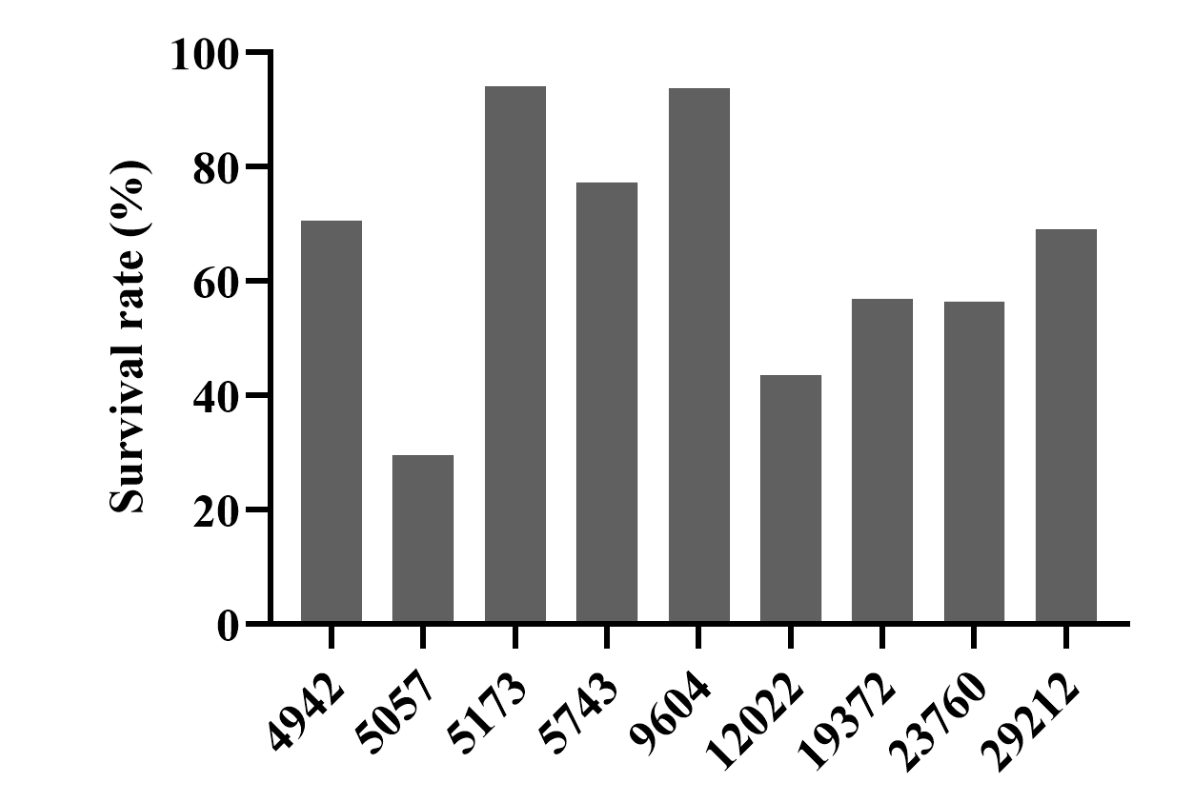


**Supplemental Figure 2.** The survival rate of 8 VRE isolates and ATCC 29212 during anti-complement killing test.

**Supplemental Table 1.** Accession of 8 VRE isolates in GenBank.

| Isolates | Accession | BioSample |
| --- | --- | --- |
| 4942 (*E. faecalis*) | JACXBA000000000 | SAMN16094718 |
| 5057 (*E. faecium*) | JACXLB000000000 | SAMN16094885 |
| 5173 (*E. faecium*) | JACXLA000000000 | SAMN16094886 |
| 5743 (*E. faecium*) | JACXKZ000000000 | SAMN16094887 |
| 9604 (*E. faecium*) | JACXKY000000000 | SAMN16094888 |
| 12022 (*E. faecalis*) | JACXAZ000000000 | SAMN16094719 |
| 19372 (*E. faecium*) | JACXKX000000000 | SAMN16094889 |
| 23760 (*E. faecium*) | JACXKW000000000 | SAMN16094890 |

**Supplemental Table 2.** The resistance genes identified in 8 VRE isolates.

| Resistance genes | 4942  (VREs) (n=18) | 5057  (VREm) (n=19) | 5173  (VREm) (n=19) | 5743  (VREm) (n=18) | 9604  (VREm) (n=17) | 12022  (VREs) (n=14) | 19372  (VREm) (n=15) | 23760  (VREm) (n=8) |
| --- | --- | --- | --- | --- | --- | --- | --- | --- |
| *AAC(6')-Ie-APH(2'')-Ia* | - | + | + | + | - | + | + | + |
| *AAC(6')-Ii* | - | + | + | + | + | - | + | - |
| *aad(6)* | - | + | + | + | + | + | - | + |
| *APH(3')-IIIa* | + | + | + | + | + | + | - | + |
| *dfrE* | + | - | - | - | - | + | - | - |
| *dfrF* | - | + | + | + | + | - | - | + |
| *dfrG* | + | + | + | - | - | - | + | - |
| *efmA* | - | + | + | + | + | - | + | - |
| *efrA* | + | - | - | - | - | + | - | - |
| *efrB* | + | - | - | - | - | + | - | - |
| *emeA* | + | - | - | - | - | + | - | - |
| *ermB* | + | + | + | + | + | - | + | - |
| *ermT* | - | - | - | + | - | - | - | - |
| *fosB3* | + | - | - | - | - | - | - | - |
| *inuB* | - | - | - | + | - | - | - | - |
| *isaA* | + | + | + | + | + | + | + | - |
| *sat-4* | + | + | + | + | + | + | - | - |
| *tet(K)* | - | + | + | - | + | - | + | - |
| *tet44* | + | + | + | - | + | + | + | - |
| *vanA* | + | + | + | + | + | - | + | - |
| *vanHA* | + | + | + | + | + | - | + | + |
| *vanRA* | + | + | + | + | + | + | + | + |
| *vanSA* | + | + | + | + | + | + | + | + |
| *vanXA* | + | + | + | + | + | - | + | - |
| *vanYA* | + | + | + | + | + | + | + | + |
| *vanZA* | + | + | + | + | + | + | + | - |

VREm, vancomycin-resistant *Enterococcus faecium*; VREs, vancomycin-resistant *E. faecalis*.

**Supplemental Table 3.** The virulence genes identified in 8 VRE isolates.

| Virulence genes | 4942  (VREs) (n=18) | 5057  (VREm) (n=19) | 5173  (VREm) (n=19) | 5743  (VREm) (n=18) | 9604  (VREm) (n=17) | 12022  (VREs) (n=14) | 19372  (VREm) (n=15) | 23760  (VREm) (n=8) |
| --- | --- | --- | --- | --- | --- | --- | --- | --- |
| *ace* | + | - | - | - | - | - | - | - |
| *acm* | - | + | + | + | + | - | + | + |
| *EF0485* | + | - | - | - | - | + | - | - |
| *EF0149* | - | - | - | - | - | + | - | - |
| *bopD* | + | + | + | + | + | + | + | + |
| *cpsA* | - | - | - | - | - | + | - | - |
| *cpsB* | + | - | - | - | - | + | - | - |
| *cpsC* | + | - | - | - | - | - | - | - |
| *cpsD* | + | - | - | - | - | - | - | - |
| *cpsE* | + | - | - | - | - | - | - | - |
| *cpsF* | + | - | - | - | - | - | - | - |
| *cpsG* | + | - | - | - | - | - | - | - |
| *cpsH* | + | - | - | - | - | - | - | - |
| *cpsI* | + | - | - | - | - | - | - | - |
| *cpsJ* | + | - | - | - | - | - | - | - |
| *cpsK* | + | - | - | - | - | - | - | - |
| *EFD32_2102* | + | - | - | - | - | - | - | - |
| *EFAU085_01747* | - | + | + | + | + | - | + | + |
| *uppS* | - | + | + | + | + | - | + | + |
| *cylA* | + | - | - | - | - | + | - | - |
| *cylB* | + | - | - | - | - | + | - | - |
| *cylI* | + | - | - | - | - | + | - | - |
| *cylL* | + | - | - | - | - | + | - | - |
| *cylM* | + | - | - | - | - | + | - | - |
| *cylR2* | + | - | - | - | - | + | - | - |
| *cylS* | + | - | - | - | - | + | - | - |
| *ebpC* | + | - | - | - | - | + | - | - |
| *OG1RF_10869* | + | - | - | - | - | - | - | - |
| *OG1RF_10870* | + | - | - | - | - | - | - | - |
| *OG1RF_10872* | + | - | - | - | - | + | - | - |
| *EFD32_0899* | - | - | - | - | - | + | - | - |
| *EFD32_0900* | - | - | - | - | - | + | - | - |
| *ecbA* | - | + | + | - | - | - | - | - |
| *efaA* | + | + | + | + | + | + | + | + |
| *esp* | - | - | - | + | + | - | - | + |
| *fss1* | + | - | - | - | - | + | - | - |
| *fss2* | + | - | - | - | - | + | - | - |
| *fss3* | + | + | + | + | + | + | - | + |
| *salA* | + | - | - | - | - | + | - | - |
| *salB* | + | - | - | - | - | - | - | - |
| *fsrC* | + | - | - | - | - | + | - | - |
| *gelE* | + | - | - | - | - | + | - | - |
| *EFD32_2606* | - | - | - | - | - | + | - | - |
| *ACI49669* | - | + | + | + | - | - | + | - |
| *ACI49670* | - | + | + | + | - | - | + | - |
| *ACI49672* | + | + | + | + | + | - | + | - |
| *pilA* | + | + | + | + | + | - | + | - |
| *pilE* | - | + | + | + | - | - | + | - |
| *pilF* | - | + | + | + | - | - | + | - |
| *ACI49664* | - | - | - | + | + | - | + | + |
| *ACI49666* | - | - | - | + | + | - | + | + |
| *ACI49667* | - | - | - | + | + | - | + | + |
| *pilB* | - | - | - | + | + | - | + | + |
| *EFAU085_02896* | - | + | + | + | + | - | + | + |
| *sprE* | + | - | - | - | - | + | - | - |

VREm, vancomycin-resistant *Enterococcus faecium*; VREs, vancomycin-resistant *E. faecalis*.

**Supplemental Table 4.** The OD590 for anti-biofilm formation of rifampin (RIF), linezolid (LNZ), fosfomycin (FM), daptomycin (DAP) alone or in combination against 8 VRE isolates and ATCC 29212.

| Groups | Time | 4942 | 5057 | 5173 | 5743 | 9604 | 12022 | 19372 | 23760 | 29212 |
| --- | --- | --- | --- | --- | --- | --- | --- | --- | --- | --- |
| Control | 24h | 0.22±0.012 | 0.06±0.001 | 0.05±0.003 | 0.05±0.002 | 0.06±0.007 | 0.61±0.023 | 0.45±0.014 | 0.31±0.007 | 0.53±0.027 |
| 48h | 0.32±0.013 | 0.11±0.004 | 0.10±0.001 | 0.10±0.008 | 0.11±0.004 | 0.64±0.026 | 0.52±0.013 | 0.32±0.005 | 0.63±0.026 |
| 72h | 0.34±0.010 | 0.11±0.008 | 0.11±0.009 | 0.12±0.011 | 0.19±0.017 | 0.85±0.041 | 0.54±0.010 | 0.38±0.022 | 0.68±0.026 |
| RIF (3mg/l) | 24h | 0.11±0.011 | 0.08±0.003 | 0.09±0.004 | 0.08±0.008 | 0.06±0.003 | 0.08±0.003 | 0.10±0.013 | 0.14±0.018 | 0.16±0.012 |
| 48h | 0.15±0.017 | 0.08±0.005 | 0.08±0.006 | 0.09±0.001 | 0.10±0.009 | 0.59±0.037 | 0.10±00.013 | 0.14±0.014 | 0.13±0.003 |
| 72h | 0.19±0.021 | 0.11±0.019 | 0.10±0.008 | 0.14±0.023 | 0.08±0.017 | 0.68±0.204 | 0.13±0.021 | 0.11±0.018 | 0.13±0.019 |
| LNZ (10mg/l) | 24h | 0.10±0.004 | 0.05±0.003 | 0.06±0.002 | 0.06±0.004 | 0.04±0.003 | 0.10±0.003 | 0.05±0.003 | 0.05±0.008 | 0.14±0.023 |
| 48h | 0.11±0.006 | 0.04±0.002 | 0.04±0.002 | 0.04±0.004 | 0.04±0.006 | 0.11±0.004 | 0.05±0.003 | 0.05±0.001 | 0.13±0.002 |
| 72h | 0.12±0.006 | 0.06±0.001 | 0.06±0.002 | 0.06±0.002 | 0.02±0.002 | 0.11±0.009 | 0.03±0.003 | 0.02±0.003 | 0.16±0.010 |
| FM (83mg/l) | 24h | 0.31±0.013 | 0.08±0.004 | 0.08±0.002 | 0.10±0.011 | 0.10±0.005 | 0.67±0.021 | 0.10±0.006 | 0.19±0.014 | 0.47±0.023 |
| 48h | 0.39±0.012 | 0.10±0.006 | 0.09±0.001 | 0.10±0.006 | 0.11±0.009 | 0.74±0.009 | 0.20±0.034 | 0.42±0.008 | 0.51±0.049 |
| 72h | 0.44±0.011 | 0.13±0.011 | 0.13±0.012 | 0.14±0.011 | 0.12±0.006 | 0.77±0.031 | 0.20±0.034 | 0.47±0.020 | 0.57±0.015 |
| DAP (20.6mg/l) | 24h | 0.07±0.002 | 0.06±0.002 | 0.06±0.001 | 0.07±0.002 | 0.05±0.003 | 0.06±0.004 | 0.05±0.002 | 0.06±0.002 | 0.06±0.002 |
| 48h | 0.06±0.004 | 0.05±0.002 | 0.04±0.003 | 0.04±0.002 | 0.05±0.001 | 0.06±0.004 | 0.05±0.002 | 0.04±0.001 | 0.05±0.005 |
| 72h | 0.09±0.009 | 0.07±0.005 | 0.06±0.001 | 0.09±0.040 | 0.03±0.007 | 0.03±0.006 | 0.03±0.003 | 0.02±0.003 | 0.06±0.016 |
| DAP (31.1mg/l) | 24h | 0.07±0.006 | 0.06±0.003 | 0.04±0.002 | 0.06±0.001 | 0.05±0.003 | 0.06±0.004 | 0.05±.002 | 0.05±0.005 | 0.06±0.002 |
| 48h | 0.07±0.001 | 0.05±0.002 | 0.04±0.004 | 0.041±0.003 | 0.06±0.002 | 0.06±0.006 | 0.04±0.002 | 0.038±0.005 | 0.05±0.004 |
| 72h | 0.09±0.006 | 0.07±0.004 | 0.06±0.001 | 0.08±0.024 | 0.03±0.002 | 0.03±0.001 | 0.02±0.003 | 0.02±0.002 | 0.04±0.001 |
| DAP (47.1mg/l) | 24h | 0.07±0.005 | 0.06±0.002 | 0.05±0.003 | 0.05±0.002 | 0.04±0.002 | 0.057±0.002 | 0.05±0.001 | 0.05±0.005 | 0.06±0.001 |
| 48h | 0.06±0.004 | 0.04±0.003 | 0.035±0.005 | 0.04±0.003 | 0.05±0.001 | 0.05±0.001 | 0.04±0.003 | 0.04±0.004 | 0.05±0.006 |
| 72h | 0.08±0.003 | 0.06±0.001 | 0.05±0.001 | 0.07±0.008 | 0.02±0.006 | 0.03±0.004 | 0.02±0.002 | 0.021±0.002 | 0.02±0.004 |
| VAN (13.3mg/l) | 24h | 0.26±0.011 | 0.26±0.035 | 0.08±0.002 | 0.07±0.001 | 0.06±0.002 | 0.6±0.018 | 0.65±0.011 | 0.23±0.012 | 0.07±0.008 |
| 48h | 0.43±0.010 | 0.35±0.020 | 0.16±0.013 | 0.15±0.015 | 0.12±0.002 | 0.71±0.017 | 0.80±0.011 | 0.57±0.024 | 0.08±0.002 |
| 72h | 0.35±0.012 | 0.31±0.013 | 0.11±0.010 | 0.10±0.004 | 0.09±0.003 | 0.72±0.026 | 0.74±0.015 | 0.56±0.007 | 0.14±0.008 |
| FM+RIF (83mg/l+3mg/l) | 24h | 0.28±0.022 | 0.04±0.001 | 0.04±0.002 | 0.02±0.001 | 0.03±0.001 | 0.06±0.003 | 0.04±0.002 | 0.08±0.001 | 0.07±0.002 |
| 48h | 0.24±0.017 | 0.25±0.014 | 0.07±0.005 | 0.03±0.003 | 0.03±0.009 | 0.45±0.016 | 0.07±0.002 | 0.13±0.009 | 0.09±0.001 |
| 72h | 0.37±0.019 | 0.34±0.005 | 0.11±0.008 | 0.06±0.003 | 0.06±0.002 | 0.76±0.020 | 0.09±0.001 | 0.11±0.017 | 0.13±0.006 |
| FM+LNZ (83mg/l+10mg/l) | 24h | 0.08±0.001 | 0.06±0.002 | 0.03±0.002 | 0.02±0.001 | 0.02±0.002 | 0.09±0.002 | 0.06±0.001 | 0.06±0.011 | 0.05±0.004 |
| 48h | 0.09±0.002 | 0.08±0.001 | 0.04±0.002 | 0.02±0.001 | 0.03±0.001 | 0.10±0.006 | 0.06±0.001 | 0.12±0.003 | 0.09±0.001 |
| 72h | 0.12±0.003 | 0.13±0.001 | 0.07±0.003 | 0.04±0.002 | 0.05±0.003 | 0.13±0.009 | 0.10±0.004 | 0.07±0.007 | 0.11±0.006 |
| FM+DAP (83mg/l+20.6mg/l) | 24h | 0.04±0.001 | 0.03±0.001 | 0.02±0.003 | 0.02±0.001 | 0.03±0.003 | 0.04±0.001 | 0.04±0.002 | 0.08±0.007 | 0.06±0.001 |
| 48h | 0.05±0.001 | 0.05±0.001 | 0.04±0.002 | 0.04±0.001 | 0.03±0.001 | 0.04±0.002 | 0.05±0.001 | 0.09±0.002 | 0.09±0.006 |
| 72h | 0.07±0.001 | 0.07±0.002 | 0.06±0.002 | 0.05±0.002 | 0.04±0.004 | 0.08±0.002 | 0.07±0.002 | 0.05±0.001 | 0.09±0.002 |
| FM+VAN (83mg/l+13.3mg/l) | 24h | 0.23±0.002 | 0.19±0.001 | 0.05±0.001 | 0.05±0.002 | 0.04±0.001 | 0.51±0.022 | 0.07±0.002 | 0.07±0.005 | 0.05±0.003 |
| 48h | 0.27±0.009 | 0.27±0.020 | 0.09±0.003 | 0.09±0.002 | 0.05±0.003 | 0.57±0.006 | 0.86±0.043 | 0.12±0.008 | 0.09±0.005 |
| 72h | 0.39±0.004 | 0.32±0.016 | 0.18±0.016 | 0.12±0.012 | 0.07±0.012 | 0.66±0.034 | 0.35±0.016 | 0.35±0.013 | 0.15±0.010 |
| RIF+LNZ (3mg/l+10mg/l) | 24h | 0.05±0.001 | 0.05±0.001 | 0.04±0.002 | 0.03±0.002 | 0.03±0.001 | 0.05±0.001 | 0.08±0.002 | 0.09±0.006 | 0.06±0.001 |
| 48h | 0.11±0.001 | 0.11±0.002 | 0.07±0.002 | 0.06±0.003 | 0.07±0.001 | 0.10±0.004 | 0.10±0.007 | 0.10±0.006 | 0.10±0.004 |
| 72h | 0.06±0.002 | 0.07±0.001 | 0.01±0.002 | 0.01±0.003 | 0.01±0.002 | 0.05±0.002 | 0.05±0.001 | 0.04±0.002 | 0.08±0.002 |
| RIF+DAP (3mg/l+20.6mg/l) | 24h | 0.04±0.002 | 0.06±0.001 | 0.03±0.001 | 0.03±0.002 | 0.03±0.002 | 0.04±0.002 | 0.05±0.002 | 0.01±0.002 | 0.01±0.002 |
| 48h | 0.09±0.001 | 0.10±0.004 | 0.07±0.001 | 0.07±0.001 | 0.07±0.001 | 0.11±0.011 | 0.09±0.002 | 0.08±0.001 | 0.09±0.001 |
| 72h | 0.04±0.004 | 0.04±0.003 | 0.01±0.002 | 0.01±0.002 | 0.01±0.001 | 0.05±0.001 | 0.04±0.002 | 0.04±0.003 | 0.05±0.002 |
| RIF+VAN (3mg/l+13.3mg/l) | 24h | 0.06±0.001 | 0.05±0.003 | 0.06±0.003 | 0.04±0.003 | 0.07±0.001 | 0.06±0.003 | 0.09±0.002 | 0.02±0.016 | 0.08±0.004 |
| 48h | 0.18±0.009 | 0.15±0.018 | 0.11±0.003 | 0.10±0.002 | 0.06±0.001 | 0.15±0.014 | 0.20±0.009 | 0.23±0.016 | 0.09±0.001 |
| 72h | 0.17±0.009 | 0.25±0.015 | 0.06±0.001 | 0.05±0.002 | 0.02±0.001 | 0.27±0.011 | 0.24±0.009 | 0.18±0.008 | 0.15±0.010 |
